# Supplementary material
Source: publisher figshare collection journal article supplement (https://acs.figshare.com/ndownloader/files/5105554)
Supplement: Supplementary file 1 [file 5105554]

## Supporting Information

### Benthic Organisms

#### 5 Algae (Figure 1)

*Entomoneis cf punctulata* is a unicellular benthic marine alga (strain no. CS-426, obtained from CSIRO Marine Research, Hobart, Tasmania, Australia). *E. cf punctulata* has been shown to be tolerant to a wide range of physico-chemical parameters including salinity (15-35 ‰), pH (6.5-8.5) and particle size (0-100% fines <63 µm). Toxicity tests with this species determine enzyme (esterase) activity, rather than growth rate as the test endpoint as nutrient release from sediments has previously been shown to stimulate algal growth, potentially masking contaminant toxicity. This test is relatively sensitive to copper (EC50 <100 µg/L), but was not sensitive to other metals such as cadmium, lead, manganese or zinc (Adams and Stauber, 2004).

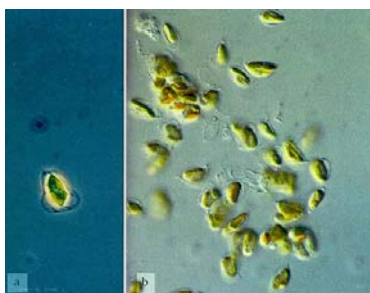

Figure 1 *Entomoneis cf punctulata*

#### Amphipods (Figure 2)

*Melita plumulosa* (family Melitidae) is commonly found in estuarine tidal mudflat areas ranging from silty to sandy sediments in freshwater, estuarine and marine environments throughout south-eastern Australia (Simpson et al., 2005). *M. plumulosa* is an epibenthic deposit-feeding amphipod, living in close association with sediments, using the sediment as both a home and a food source. They are an important source of food for higher trophic levels. They inhabit a wide variety of surroundings from intertidal seagrass beds to muddy sand, up to a water depth of 25 m. *M. plumulosa* resides mostly on the sediment surface, rather than burrowing deeply into sediments. Male species grow to an approximate length of 7 mm, and females to a length of 5 mm (Lowry et al., 2000; Simpson et al., 2005).

*Corophium colo* (Fam. Corophidae) is an infaunal sediment dwelling corophiid amphipod (Lowry, 2004; Lowry et al., 2000) and is abundant in fresh and estuarine tidal sections of the Hawkesbury River catchment in New South Wales (Hyne and Everett, 1998). The amphipod is typically found 1-5 cm below the sediment surface in the intertidal zone of river banks which are vertical, of solid structure, low sand content, with abundant macrophyte growth and water in the range 0.1-24‰.

These amphipods build U-shaped burrows in sediment consisting of fine sand mixed with clays. Females of *C. colo* with body lengths greater than 8 mm were considered sexually mature as no gravid individuals were observed below this size. The average maximum body length of females was 13.1 mm and that of males was 11.6 mm (Surtikanti et al., 1998, 2000). *C. colo* normally only feed in their burrows, obtaining food by moving their appendages to create a water current from the sediment surface.

*Corophium insidiosum* (Fam. Corophidae) was discovered in 1931, assumed to be introduced to Australia through aquaculture practices or ship hull ballast waters, and has a widespread distribution in Victoria, Australia (Adams et al., 2001). *C. insidiosum* build U-shaped burrows in sediment consisting of fine sand mixed with clays. Male species grow to an approximate length of 10 mm, and females to a length of 7 mm. *C. insidiosum* feed mostly in their burrows, obtaining food by moving their appendages to create a water-current from the sediment surface.

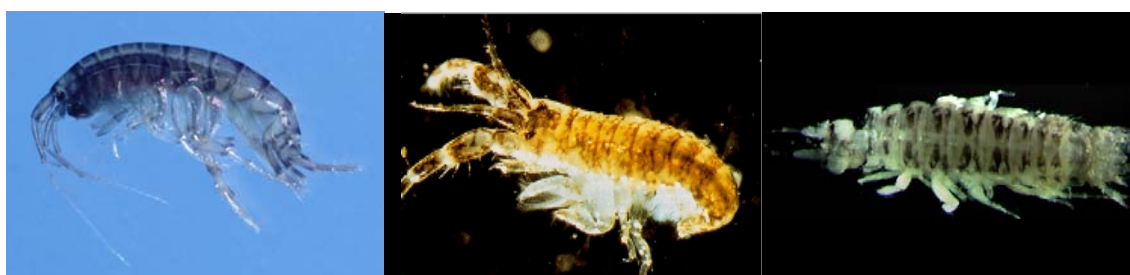

**Figure 3**      *Melita plumulosa*                      *Corophium colo*                      *Corophium insidiosum*

### Bivalve Clams (Figure 3)

*Tellina deltoidalis* (Fam. Tellinidae) is endemic to Australia and ranges from southern Queensland to Tasmania and south Western Australia. It has a smooth, broadly triangular shell that is laterally compressed and grows to approximately 20 mm in length. Tissue weights (no shell) were 10-150 mg (wet) and 2-30 mg (dry). This species is found in estuarine and coastal lagoons and burrows into sand or mud, often amongst seagrass. Like other tellinids, *T. deltoidalis* is a deposit feeder, collecting organic material and particles from surface sediments [Willan, 1998; Ponder et al., 2000].

*Soletellina alba* (Fam. Psammobiidae) is endemic to Australia, ranging from mid Queensland to South Australia in estuaries and coastal areas (King et al., 2004). The shell of *S. alba* is oblong to rectangular in shape and grows to a length of 50 mm. Tissue weights (no shell) were 100-1500 mg (wet) and 10-400 mg (dry). This species burrow deeply (to 30 cm) in sands or muds and filter feeds on particulate matter, collected from the overlying water by using their long inhalent siphon which can protude well above the surface of the sediment (Willan, 1998; Ponder et al., 2000).

*Mysella anomala* (Fam. Galeommatidae) is a common bivalve found in estuaries and coastal areas in NSW (Ponder, 1998; Ponder et al., 2000; King et al., 2004). It has a very small (<5 mm) broadly triangular shell, and burrows shallow in muddy to sandy areas. Tissue weights (no shell) were 5-25 mg (wet) and 1-15 mg (dry). It feeds by filtering suspended particles from overlying waters (Ponder,

1998; Ponder et al., 2000).

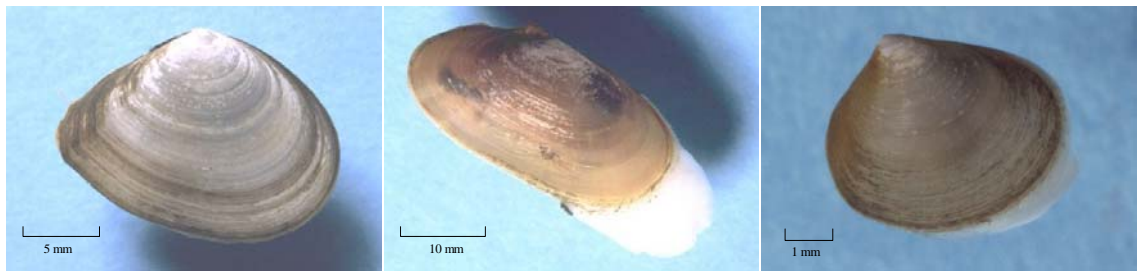

65 **Figure 3** *Tellina deltoidalis* *Soletellina alba* *Mysella anomala*

#### Polychaete worms (Figure 4)

*Australonereis ehlersi* (Fam. Nereididae) is very common in estuarine and coastal areas throughout the southern region of Australia from Western Australia to Queensland (King et al., 2004). It inhabits in a wide range of sediment types, from coarse sand to fine mud, and grows to be a length of 20 cm. Worms were generally 6-10 cm in length and had body weights of 100-800 mg (wet) and 10-150 mg (dry). While this species is reportedly a deposit feeder, it also has carnivorous attributes, with an eversible pharynx and a pair of jaws (Glasby et al., 2000). It forms a series of mucus-lined burrows of up to 40 cm long, which protect the worms from predators including fish and birds.

70 *Nephtys australiensis* (Fam. Nephtyidae) is endemic to Australia and is most commonly found in muddy intertidal and sub-tidal sediments in the estuaries of south-eastern Australia (King et al., 2004). The body of *N. australiensis* is muscular, enabling this species to swim powerfully and to burrow to depths of up to 20 cm. Worms were generally 5-9 cm in length and had body weights of 20-200 mg (wet) and 4-40 mg (dry). This species is free-living within the sediment and does not form permanent tubes. Nephtyids are thought to be predators on other small invertebrates, although some studies  
80 have suggested that they may be opportunistic feeders, switching between carnivory and sub-surface deposit feeding when prey items are scarce (Glasby et al., 2000).

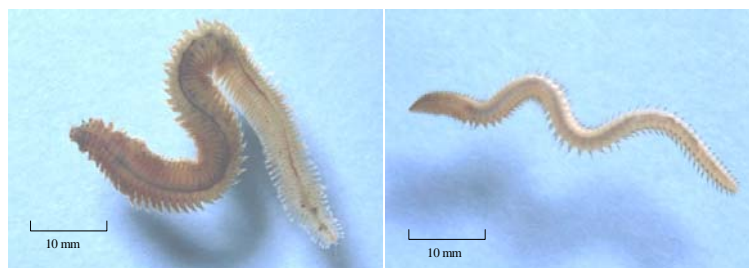

**Figure 4** *Australonereis ehlersi* *Nephtys australiensis*

## 85    **References**

- Adams, M. S.; Stauber, J. L. Development of a whole-sediment toxicity test using a benthic marine microalga. *Environ. Toxicol. Chem.* **2004**, 23, 1957-1968.
- Adams, M. S.; Duda, S.; Stauber, J. L.; Gunthorpe, L. Development of marine whole-sediment toxicity tests – NHT grant final report. National Heritage Trust Report: Environment Australia, Canberra, Australia, 2001; 200 pp.
- Glasby, C. J.; Hutchings, P. A.; Fauchald, K.; Paxton, H.; Rouse, G. W.; Watson Russell, C.; Wilson, R. S. Class Polychaeta (Chapter 1). In: Polychaetes and their allies: The Southern Synthesis. Fauna of Australia. Vol 4A Polychaeta, Myzostomida, Pogonophora, Echiura, Sipuncula, Beesley, P. L., Ross, C. J. B., and Glasby, C. J., Eds.; CSIRO Publishing: Melbourne, Australia, 2000; pp. 1-296.
- Hyne, R. V.; Everett, D. A. Application of a benthic euryhaline amphipod, *Corophium* sp. as a sediment toxicity testing organism for both freshwater and estuarine systems. *Arch. Environ. Contam. Toxicol.* **1998**, 34, 26-33.
- King, C. K.; Dowse, M. C.; Simpson S. L.; Jolley, D.F. An assessment of five Australian polychaetes and bivalves for use in whole sediment toxicity tests: toxicity and accumulation of copper and zinc from water and sediment. *Arch. Environ. Contam. Toxicol.*, **2004**, 47, 314-323.
- Lowry, J. K. A new species of *Corophium* from eastern Australian estuaries (Crustacea: Amphipoda: Corophiidae: Corophiinae: Corophiini). *Zootaxa*, **2004**, 754, 1-10.
- Lowry, J. K.; Berents, P. B.; Springthorpe, R. T. 2000  
<http://www.crustacea.net/crustace/amphipoda/melitidae/www/plumulo.htm>
- Ponder, W. F. Superfamily Galeommatoidea. In: Mollusca: The Southern Synthesis. Fauna of Australia. Vol 5, Part B, Beesley, P. L.; Ross, G. J. B.; Wells, A., Eds.; CSIRO Publishing: Melbourne, Australia, 1998; pp. 316-318.
- Ponder, W. F.; Clark, S. A.; Dallwitz, M. J. Freshwater and estuarine molluscs: An interactive, illustrated key for New South Wales. CSIRO Publishing: Melbourne, Australia, 2000.
- Simpson, S. L.; Batley, G. E.; Chariton, A. A.; Stauber, J. L.; King, C. K.; Chapman, J. C.; Hyne, R.V.; Gale, S. A.; Roach, A. C.; Maher, W. A.; Handbook for Sediment Quality Assessment. New South Wales Environmental Trust, New South Wales Department of Environment and Conservation: Sydney, Australia, 2004.
- Surtikanti, H. K.; Hyne, R. V.; Everett, D. A.; Lim, R. P. Population density and breeding periodicity of the amphipod *Corophium* sp., in the Hawkesbury River. *Australaian. J. Ecotox.*, **1998**, 4, 85-91.
- Surtikanti, H. K.; Hyne, R. V. Sediment toxicity testing using the amphipod *Corophium* sp: Standardisation of test conditions for an acute survival test and a sub-chronic growth test in freshwater. *Australian. J. Ecotox.*, **2000**, 6,11-20.
- Willan, R.C. (1998). Superfamily Tellinoidea. In: Mollusca: The Southern Synthesis, Fauna of Australia. Vol 5, Part B, Beesley, P. L.; Ross, G. J. B.; Wells, A.; Eds CSIRO Publishing: Melbourne, Australia, 2000; pp. 342-348.

125

**Table S1. Effect concentrations for sediments with a range of copper-partitioning properties ( $K_d$ ) calculated using exposure-effects model with both water and sediment exposure-effects pathways (4-d exposure) <sup>a</sup>**

| Sediment Type:<br>$K_d$ , L/kg: | Silt<br>High Fe/TOC<br>$1 \times 10^5$   | Silt<br>Med Fe/TOC<br>$5 \times 10^4$ | Silt-Sand<br>Med Fe/TOC<br>$1 \times 10^4$ | Silt-Sand<br>Low Fe/TOC<br>$5 \times 10^3$ | Sandy<br>Low Fe/TOC<br>$1 \times 10^3$ | Sand<br>V.Low Fe/TOC<br>$5 \times 10^2$ |
|---------------------------------|------------------------------------------|---------------------------------------|--------------------------------------------|--------------------------------------------|----------------------------------------|-----------------------------------------|
| Organism                        | LC50, mg/kg copper (4-d exposure period) |                                       |                                            |                                            |                                        |                                         |
| <i>Melita plumulosa</i>         | 3500                                     | 3250                                  | 2060                                       | 1430                                       | 408                                    | 213                                     |
| <i>Corophium colo</i>           | 10300                                    | 10300                                 | 8750                                       | 7500                                       | 3500                                   | 2100                                    |
| <i>Corophium insidiosum</i>     | 3930                                     | 3750                                  | 2600                                       | 1900                                       | 595                                    | 325                                     |
| <i>Tellina deltoidalis</i>      | 2680                                     | 2550                                  | 1580                                       | 1080                                       | 305                                    | 163                                     |
| <i>Soletellina alba</i>         | 3170                                     | 2500                                  | 950                                        | 530                                        | 118                                    | 60                                      |
| <i>Mysella anomala</i>          | 9800                                     | 9250                                  | 6180                                       | 4380                                       | 1310                                   | 700                                     |
| <i>Australoneris ehlersi</i>    | 3530                                     | 2875                                  | 1180                                       | 675                                        | 153                                    | 78                                      |
| <i>Nephtys australiensis</i>    | 6550                                     | 5000                                  | 1730                                       | 960                                        | 205                                    | 103                                     |

<sup>a</sup> Exposure-effect model (equation 4) used the parameters in Table 2 and  $K_d = 5 \times 10^4$  L/kg.

130

**Table S2. PC 95 (50) values calculated using species sensitivity distributions for nine Australian benthic organisms <sup>a</sup>**

135

| Sediment Type:<br>$K_d$ , L/kg: | Silt<br>High Fe/TOC<br>$1 \times 10^5$ | Silt<br>Med Fe/TOC<br>$5 \times 10^4$ | Silt-Sand<br>Med Fe/TOC<br>$1 \times 10^4$ | Silt-Sand<br>Low Fe/TOC<br>$5 \times 10^3$ | Sandy<br>Low Fe/TOC<br>$1 \times 10^3$ | Sand<br>V.Low Fe/TOC<br>$5 \times 10^2$ |
|---------------------------------|----------------------------------------|---------------------------------------|--------------------------------------------|--------------------------------------------|----------------------------------------|-----------------------------------------|
| Exposure                        | PC 95 (50), mg/kg                      |                                       |                                            |                                            |                                        |                                         |
| 4-d Water-only LOEC             | 7250                                   | 3620                                  | 725                                        | 362                                        | 72.3                                   | 36.2                                    |
| 4-d Water-only LC50             | 4690                                   | 2350                                  | 469                                        | 234                                        | 46.9                                   | 23.5                                    |
| 4-d Whole-sediment LC50         | 2480                                   | 2230                                  | 945                                        | 515                                        | 106                                    | 53.0                                    |
| 10-d Whole-sediment LC50        | 993                                    | 893                                   | 378                                        | 206                                        | 42.5                                   | 21.2                                    |

<sup>a</sup> PC 95 (50) values (95% protection concentrations, 50% confidence) calculated using (i) 4-d water-only LC50 and LOEC values (Table 1) and equilibrium partitioning model (equation 3), and (ii) 4-d (Table S1) and 10-d (Table 4) whole-sediment LC50 values from exposure-effect model (equation 4)

140

**Table S3. Effect copper assimilation efficiency on exposure-effects for sediments with a range of copper-partitioning properties ( $K_d$ )<sup>a</sup>**

| Sediment $K_d$ , L/kg:     | $1 \times 10^5$           | $5 \times 10^4$ | $1 \times 10^4$ | $5 \times 10^3$ | $1 \times 10^3$ | $5 \times 10^2$ |
|----------------------------|---------------------------|-----------------|-----------------|-----------------|-----------------|-----------------|
| <b>AE not adjusted</b>     |                           |                 |                 |                 |                 |                 |
| <b>Organism</b>            | <b>LC50, mg/kg copper</b> |                 |                 |                 |                 |                 |
| <i>M. plumulosa</i>        | 1400                      | 1300            | 825             | 570             | 163             | 85              |
| <i>C. colo</i>             | 4120                      | 4100            | 3500            | 3000            | 1400            | 840             |
| <i>C. insidiosum</i>       | 1570                      | 1500            | 1040            | 760             | 238             | 130             |
| <i>T. deltoidalis</i>      | 1070                      | 1020            | 630             | 430             | 122             | 65              |
| <i>S. alba</i>             | 1269                      | 1000            | 380             | 212             | 47              | 24              |
| <i>M. anomala</i>          | 3920                      | 3700            | 2470            | 1750            | 525             | 280             |
| <i>A. ehlersi</i>          | 1410                      | 1150            | 470             | 270             | 61              | 31              |
| <i>N. australiensis</i>    | 2620                      | 2000            | 690             | 385             | 82              | 41              |
| <b>AE increased by 50%</b> |                           |                 |                 |                 |                 |                 |
| <b>Organism</b>            | <b>LC50, mg/kg copper</b> |                 |                 |                 |                 |                 |
| <i>M. plumulosa</i>        | 950                       | 900             | 650             | 480             | 155             | 83.7            |
| <i>C. colo</i>             | 2760                      | 2730            | 2470            | 2210            | 1200            | 764             |
| <i>C. insidiosum</i>       | 1110                      | 1030            | 825             | 617             | 231             | 123             |
| <i>T. deltoidalis</i>      | 733                       | 695             | 494             | 363             | 116             | 63.0            |
| <i>S. alba</i>             | 925                       | 780             | 337             | 198             | 46.0            | 23.0            |
| <i>M. anomala</i>          | 2680                      | 2560            | 1910            | 1440            | 494             | 271             |
| <i>A. ehlersi</i>          | 1010                      | 873             | 415             | 251             | 61              | 31.7            |
| <i>N. australiensis</i>    | 1950                      | 1580            | 634             | 362             | 82              | 41.5            |
| <b>AE decreased by 50%</b> |                           |                 |                 |                 |                 |                 |
| <b>Organism</b>            | <b>LC50, mg/kg copper</b> |                 |                 |                 |                 |                 |
| <i>M. plumulosa</i>        | 2580                      | 2260            | 1130            | 700             | 172             | 88.6            |
| <i>C. colo</i>             | 2980                      | 2690            | 1510            | 980             | 256             | 133             |
| <i>C. insidiosum</i>       | 8080                      | 7770            | 6000            | 4670            | 1680            | 934             |
| <i>T. deltoidalis</i>      | 1980                      | 1730            | 860             | 528             | 129             | 66              |
| <i>S. alba</i>             | 2000                      | 1410            | 420             | 223             | 47              | 23.7            |
| <i>M. anomala</i>          | 7370                      | 6560            | 3500            | 2210            | 560             | 290             |
| <i>A. ehlersi</i>          | 2300                      | 1690            | 539             | 291             | 62.3            | 31.4            |
| <i>N. australiensis</i>    | 4000                      | 2710            | 760             | 400             | 83.5            | 42.0            |

<sup>a</sup> Exposure-effect model (equation 4) used the parameters in Table 3, except the AE was adjusted up or down by 50% for two sets of calculations. A 10-d exposure model was used and  $K_d = 5 \times 10^4$  L/kg.

**Table S4. Effect of copper assimilation efficiency (AE) on calculated PC 95 (50) values**

| Sediment Type:      | Silt                     | Silt            | Silt-Sand       | Silt-Sand       | Sandy           | Sand            |
|---------------------|--------------------------|-----------------|-----------------|-----------------|-----------------|-----------------|
|                     | High Fe/TOC              | Med Fe/TOC      | Med Fe/TOC      | Low Fe/TOC      | Low Fe/TOC      | V.Low Fe/TOC    |
| $K_d$ , L/kg:       | $1 \times 10^5$          | $5 \times 10^4$ | $1 \times 10^4$ | $5 \times 10^3$ | $1 \times 10^3$ | $5 \times 10^2$ |
| <b>Exposure</b>     | <b>PC 95 (50), mg/kg</b> |                 |                 |                 |                 |                 |
| AE increased by 50% | 681                      | 639             | 337             | 197             | 42.5            | 21.2            |
| AE not adjusted     | 993                      | 893             | 378             | 206             | 42.5            | 21.2            |
| AE decreased by 50% | 1770                     | 1370            | 410             | 211             | 42.5            | 21.2            |

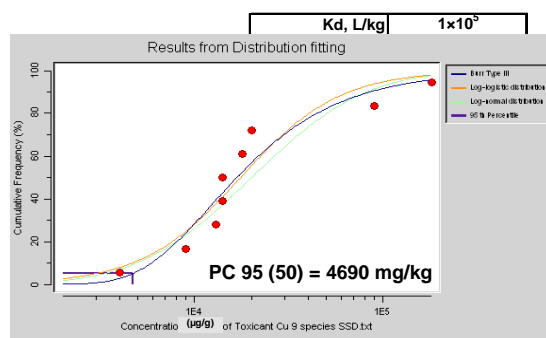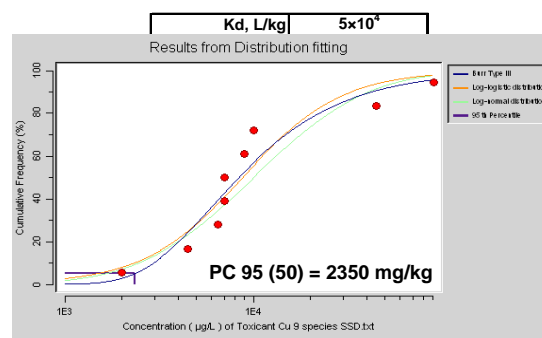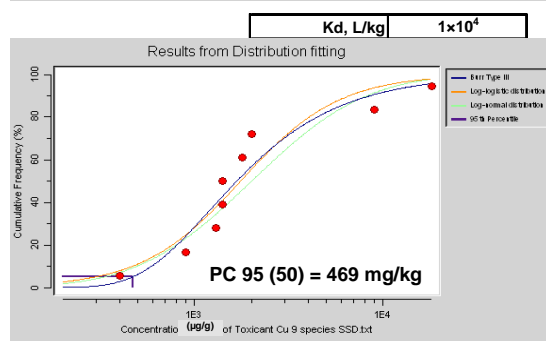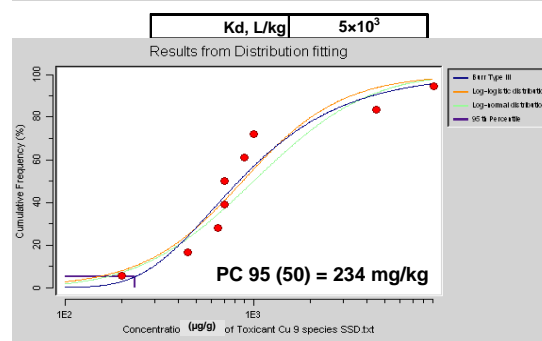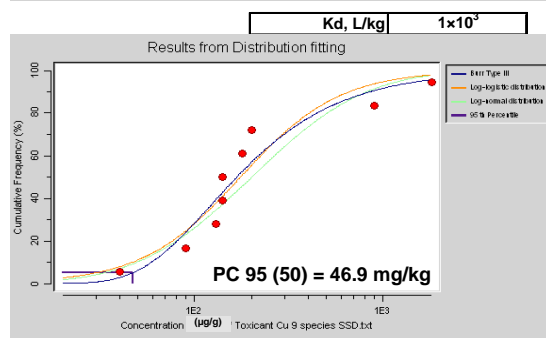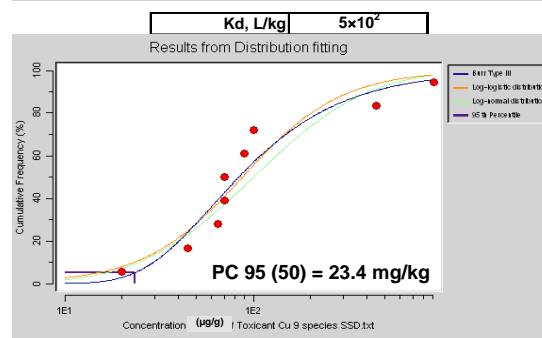

**Figure S1 Species sensitivity distributions (SSD) for copper in sediments with a range of copper-partitioning properties ( $K_d$ ). Effect concentrations calculated using using equilibrium-partitioning and water-only effects concentrations (4-d LOEC water-only exposure)**

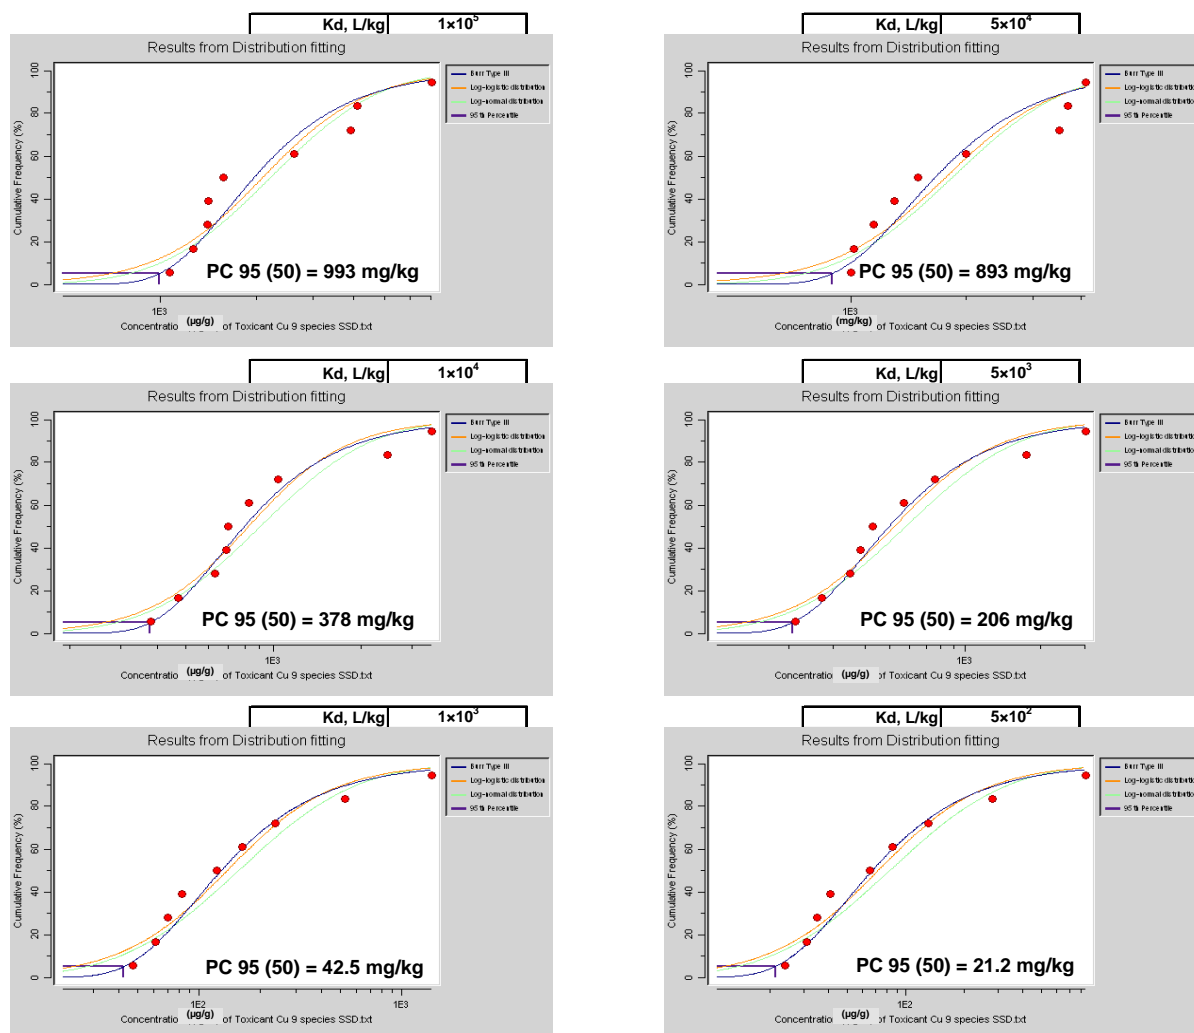

**Figure S2 Species sensitivity distributions (SSD) for copper in sediments with a range of copper-partitioning properties ( $K_d$ ). Effect concentrations calculated using exposure-effects model with both water and sediment exposure-effects pathways (10-d exposure)**
